# Supplementary material for: Long-Aged Parmigiano Reggiano PDO: Trace Element Determination Targeted to Health
Source: MDPI journal article supplement (doi:10.3390/foods11020172), 2022-01-10
Supplement: s1 [file s1]

Table S1: Selenium were determined in different cheese samples for aged and collection season milk.

| Cheese aged for 24 months |           |         |        |
|---------------------------|-----------|---------|--------|
| Season of milk            | N° sample | µg/100g | µg/50g |
| Summer                    | 1         | 28.80   | 14.40  |
| Summer                    | 2         | 29.40   | 14.70  |
| Summer                    | 3         | 24.00   | 12.00  |
| Summer                    | 4         | 33.60   | 16.80  |
| Summer                    | 5         | 28.80   | 14.40  |
| Summer                    | 6         | 20.40   | 10.20  |
| Summer                    | 7         | 33.60   | 16.80  |
| Summer                    | 8         | 21.00   | 10.50  |
| Summer                    | 9         | 30.00   | 15.00  |
| Summer                    | 10        | 25.20   | 12.60  |
| Summer                    | 11        | 22.80   | 11.40  |
| Summer                    | 12        | 21.60   | 10.80  |
| Summer                    | 13        | 31.20   | 15.60  |
| Summer                    | 14        | 21.60   | 10.80  |
| Summer                    | 15        | 24.00   | 12.00  |
| Summer                    | 16        | 18.00   | 9.00   |
| Summer                    | 17        | 31.20   | 15.60  |
| Summer                    | 18        | 15.60   | 7.80   |
| Summer                    | 19        | 21.60   | 10.80  |
| Summer                    | 20        | 26.40   | 13.20  |
| Summer                    | 21        | 16.80   | 8.40   |
| Summer                    | 22        | 14.40   | 7.20   |
| Summer                    | 23        | 31.20   | 15.60  |
| Summer                    | 24        | 27.60   | 13.80  |
| Summer                    | 25        | 33.60   | 16.80  |
| Cheese aged for 40 months |           |         |        |
| Season of milk            | N° sample | µg/100g | µg/30g |
| Summer                    | 26        | 33.60   | 10.08  |
| Summer                    | 27        | 35.40   | 10.62  |
| Summer                    | 28        | 33.00   | 9.90   |
| Summer                    | 29        | 31.80   | 9.54   |
| Summer                    | 30        | 35.40   | 10.62  |
| Summer                    | 31        | 39.00   | 11.70  |
| Summer                    | 32        | 40.80   | 12.24  |
| Summer                    | 33        | 46.80   | 14.04  |
| Summer                    | 34        | 43.20   | 12.96  |
| Summer                    | 35        | 35.40   | 10.62  |
| Summer                    | 36        | 43.80   | 13.14  |
| Summer                    | 37        | 34.80   | 10.44  |

|        |    |       |       |
|--------|----|-------|-------|
| Summer | 38 | 28.80 | 8.64  |
| Summer | 39 | 33.60 | 10.08 |
| Summer | 40 | 46.20 | 13.86 |
| Summer | 41 | 35.40 | 10.62 |
| Summer | 42 | 37.20 | 11.16 |
| Summer | 43 | 40.80 | 12.24 |
| Summer | 44 | 34.80 | 10.44 |
| Summer | 45 | 30.60 | 9.18  |
| Summer | 46 | 56.40 | 16.92 |
| Summer | 47 | 33.60 | 10.08 |
| Summer | 48 | 28.80 | 8.64  |
| Summer | 49 | 27.60 | 8.28  |
| Summer | 50 | 46.80 | 14.04 |

Cheese aged for 24  
months

| Season<br>of milk | N° Sample | µg/100g | µg/50g |
|-------------------|-----------|---------|--------|
| Winter            | 51        | 28.20   | 14.10  |
| Winter            | 52        | 25.20   | 12.60  |
| Winter            | 53        | 30.00   | 15.00  |
| Winter            | 54        | 24.00   | 12.00  |
| Winter            | 55        | 27.60   | 13.80  |
| Winter            | 56        | 25.20   | 12.60  |
| Winter            | 57        | 26.40   | 13.20  |
| Winter            | 58        | 25.20   | 12.60  |
| Winter            | 59        | 30.60   | 15.30  |
| Winter            | 60        | 25.20   | 12.60  |
| Winter            | 61        | 25.80   | 12.90  |
| Winter            | 62        | 25.20   | 12.60  |
| Winter            | 63        | 27.60   | 13.80  |
| Winter            | 64        | 28.80   | 14.40  |
| Winter            | 65        | 25.20   | 12.60  |
| Winter            | 66        | 22.80   | 11.40  |
| Winter            | 67        | 19.20   | 9.60   |
| Winter            | 68        | 24.00   | 12.00  |
| Winter            | 69        | 21.60   | 10.80  |
| Winter            | 70        | 23.40   | 11.70  |
| Winter            | 71        | 28.80   | 14.40  |
| Winter            | 72        | 20.40   | 10.20  |
| Winter            | 73        | 28.80   | 14.40  |
| Winter            | 74        | 30.00   | 15.00  |
| Winter            | 75        | 26.40   | 13.20  |

Cheese aged for 40  
months

| Season<br>of milk | N° sample | µg/100g | µg/30g |
|-------------------|-----------|---------|--------|
| Winter            | 76        | 43.80   | 13.14  |
| Winter            | 77        | 43.80   | 13.14  |
| Winter            | 78        | 37.20   | 11.16  |

|        |     |       |       |
|--------|-----|-------|-------|
| Winter | 79  | 36.60 | 10.98 |
| Winter | 80  | 32.40 | 9.72  |
| Winter | 81  | 30.60 | 9.18  |
| Winter | 82  | 32.40 | 9.72  |
| Winter | 83  | 32.40 | 9.72  |
| Winter | 84  | 40.20 | 12.06 |
| Winter | 85  | 32.40 | 9.72  |
| Winter | 86  | 33.60 | 10.08 |
| Winter | 87  | 28.80 | 8.64  |
| Winter | 88  | 40.20 | 12.06 |
| Winter | 89  | 37.20 | 11.16 |
| Winter | 90  | 32.40 | 9.72  |
| Winter | 91  | 33.00 | 9.90  |
| Winter | 92  | 34.80 | 10.44 |
| Winter | 93  | 33.00 | 9.90  |
| Winter | 94  | 30.60 | 9.18  |
| Winter | 95  | 28.20 | 8.46  |
| Winter | 96  | 36.60 | 10.98 |
| Winter | 97  | 32.40 | 9.72  |
| Winter | 98  | 32.40 | 9.72  |
| Winter | 99  | 31.20 | 9.36  |
| Winter | 100 | 29.40 | 8.82  |

---

Table S2: Chromium were determined in different cheese samples for aged and collection season milk.

| Cheese aged for 24 months |           |         |        |
|---------------------------|-----------|---------|--------|
| Season of milk            | N° Sample | µg/100g | µg/50g |
| Summer                    | 1         | 12.13   | 6.07   |
| Summer                    | 2         | 14.11   | 7.06   |
| Summer                    | 3         | 9.99    | 5.00   |
| Summer                    | 4         | 24.11   | 12.06  |
| Summer                    | 5         | 15.44   | 7.72   |
| Summer                    | 6         | 13.77   | 6.89   |
| Summer                    | 7         | 21.11   | 10.56  |
| Summer                    | 8         | 19.77   | 9.89   |
| Summer                    | 9         | 11.34   | 5.67   |
| Summer                    | 10        | 13.28   | 6.64   |
| Summer                    | 11        | 7.17    | 3.59   |
| Summer                    | 12        | 13.15   | 6.58   |
| Summer                    | 13        | 14.16   | 7.08   |
| Summer                    | 14        | 9.21    | 4.61   |
| Summer                    | 15        | 7.77    | 3.89   |
| Summer                    | 16        | 8.91    | 4.46   |
| Summer                    | 17        | 15.88   | 7.94   |
| Summer                    | 18        | 20.11   | 10.06  |
| Summer                    | 19        | 17.66   | 8.83   |
| Summer                    | 20        | 16.99   | 8.50   |
| Summer                    | 21        | 16.88   | 8.44   |
| Summer                    | 22        | 6.22    | 3.11   |
| Summer                    | 23        | 6.88    | 3.44   |
| Summer                    | 24        | 14.11   | 7.06   |
| Summer                    | 25        | 18.22   | 9.11   |
| Cheese aged for 40 months |           |         |        |
| Season of milk            | N° Sample | µg/100g | µg/30g |
| Summer                    | 26        | 26.83   | 8.05   |
| Summer                    | 27        | 25.35   | 7.61   |
| Summer                    | 28        | 23.99   | 7.20   |
| Summer                    | 29        | 25.93   | 7.78   |
| Summer                    | 30        | 21.01   | 6.30   |
| Summer                    | 31        | 28.80   | 8.64   |
| Summer                    | 32        | 26.52   | 7.96   |
| Summer                    | 33        | 25.15   | 7.55   |
| Summer                    | 34        | 21.64   | 6.49   |
| Summer                    | 35        | 28.13   | 8.44   |
| Summer                    | 36        | 25.77   | 7.73   |
| Summer                    | 37        | 22.62   | 6.79   |
| Summer                    | 38        | 27.76   | 8.33   |

|        |    |       |      |
|--------|----|-------|------|
| Summer | 39 | 22.14 | 6.64 |
| Summer | 40 | 25.45 | 7.64 |
| Summer | 41 | 22.75 | 6.83 |
| Summer | 42 | 24.13 | 7.24 |
| Summer | 43 | 21.79 | 6.54 |
| Summer | 44 | 23.55 | 7.07 |
| Summer | 45 | 25.90 | 7.77 |
| Summer | 46 | 23.71 | 7.11 |
| Summer | 47 | 26.71 | 8.01 |
| Summer | 48 | 28.60 | 8.58 |
| Summer | 49 | 28.71 | 8.61 |
| Summer | 50 | 30.70 | 9.21 |

Cheese aged for 24  
months

| Season<br>of milk | N° Sample | µg/100g | µg/50g |
|-------------------|-----------|---------|--------|
| Winter            | 51        | 14.66   | 7.33   |
| Winter            | 52        | 15.12   | 7.56   |
| Winter            | 53        | 16.66   | 8.33   |
| Winter            | 54        | 18.77   | 9.39   |
| Winter            | 55        | 14.11   | 7.06   |
| Winter            | 56        | 20.11   | 10.06  |
| Winter            | 57        | 18.11   | 9.06   |
| Winter            | 58        | 13.70   | 6.85   |
| Winter            | 59        | 16.51   | 8.26   |
| Winter            | 60        | 17.55   | 8.78   |
| Winter            | 61        | 16.11   | 8.06   |
| Winter            | 62        | 10.87   | 5.44   |
| Winter            | 63        | 16.98   | 8.49   |
| Winter            | 64        | 12.88   | 6.44   |
| Winter            | 65        | 12.11   | 6.06   |
| Winter            | 66        | 9.89    | 4.95   |
| Winter            | 67        | 7.88    | 3.94   |
| Winter            | 68        | 18.14   | 9.07   |
| Winter            | 69        | 13.05   | 6.53   |
| Winter            | 70        | 10.88   | 5.44   |
| Winter            | 71        | 7.87    | 3.94   |
| Winter            | 72        | 19.88   | 9.94   |
| Winter            | 73        | 15.77   | 7.89   |
| Winter            | 74        | 12.66   | 6.33   |
| Winter            | 75        | 14.99   | 7.50   |

Cheese aged for 40  
months

| Season<br>of milk | N° Sample | µg/100g | µg/30g |
|-------------------|-----------|---------|--------|
| Winter            | 76        | 29.18   | 8.75   |
| Winter            | 77        | 27.01   | 8.10   |
| Winter            | 78        | 20.23   | 6.07   |
| Winter            | 79        | 21.88   | 6.56   |

|        |     |       |       |
|--------|-----|-------|-------|
| Winter | 80  | 23.40 | 7.02  |
| Winter | 81  | 20.74 | 6.22  |
| Winter | 82  | 24.59 | 7.38  |
| Winter | 83  | 23.74 | 7.12  |
| Winter | 84  | 29.77 | 8.93  |
| Winter | 85  | 30.65 | 9.20  |
| Winter | 86  | 25.53 | 7.66  |
| Winter | 87  | 24.85 | 7.46  |
| Winter | 88  | 26.09 | 7.83  |
| Winter | 89  | 25.41 | 7.62  |
| Winter | 90  | 29.73 | 8.92  |
| Winter | 91  | 27.52 | 8.26  |
| Winter | 92  | 24.88 | 7.46  |
| Winter | 93  | 31.91 | 9.57  |
| Winter | 94  | 28.69 | 8.61  |
| Winter | 95  | 27.35 | 8.21  |
| Winter | 96  | 22.09 | 6.63  |
| Winter | 97  | 16.66 | 5.00  |
| Winter | 98  | 27.85 | 8.36  |
| Winter | 99  | 29.71 | 8.91  |
| Winter | 100 | 35.29 | 10.59 |

Table S3: Zinc were determined in different cheese samples for aged and collection season milk.

| Cheese aged for 24 months |           |         |        |
|---------------------------|-----------|---------|--------|
| Season of milk            | N° sample | µg/100g | µg/50g |
| Summer                    | 1         | 3.93    | 1.97   |
| Summer                    | 2         | 3.81    | 1.91   |
| Summer                    | 3         | 2.02    | 1.01   |
| Summer                    | 4         | 2.54    | 1.27   |
| Summer                    | 5         | 4.18    | 2.09   |
| Summer                    | 6         | 3.74    | 1.87   |
| Summer                    | 7         | 4.60    | 2.30   |
| Summer                    | 8         | 2.70    | 1.35   |
| Summer                    | 9         | 2.78    | 1.39   |
| Summer                    | 10        | 4.20    | 2.10   |
| Summer                    | 11        | 2.46    | 1.23   |
| Summer                    | 12        | 2.10    | 1.05   |
| Summer                    | 13        | 2.30    | 1.15   |
| Summer                    | 14        | 2.78    | 1.39   |
| Summer                    | 15        | 2.38    | 1.19   |
| Summer                    | 16        | 1.86    | 0.93   |

|        |    |      |      |
|--------|----|------|------|
| Summer | 17 | 1.74 | 0.87 |
| Summer | 18 | 4.37 | 2.19 |
| Summer | 19 | 2.47 | 1.24 |
| Summer | 20 | 5.80 | 2.90 |
| Summer | 21 | 5.45 | 2.73 |
| Summer | 22 | 2.98 | 1.49 |
| Summer | 23 | 3.12 | 1.56 |
| Summer | 24 | 2.95 | 1.48 |
| Summer | 25 | 2.67 | 1.34 |

Cheese aged for 40  
months

| Season<br>of milk | N° sample | µg/100g | µg/30g |
|-------------------|-----------|---------|--------|
| Summer            | 26        | 4.49    | 1.35   |
| Summer            | 27        | 5.45    | 1.64   |
| Summer            | 28        | 4.83    | 1.45   |
| Summer            | 29        | 3.43    | 1.03   |
| Summer            | 30        | 5.71    | 1.71   |
| Summer            | 31        | 5.21    | 1.56   |
| Summer            | 32        | 2.84    | 0.85   |
| Summer            | 33        | 2.93    | 0.88   |
| Summer            | 34        | 4.50    | 1.35   |
| Summer            | 35        | 4.31    | 1.29   |
| Summer            | 36        | 2.45    | 0.74   |
| Summer            | 37        | 4.65    | 1.40   |
| Summer            | 38        | 0.13    | 0.04   |
| Summer            | 39        | 4.12    | 1.24   |
| Summer            | 40        | 4.11    | 1.23   |
| Summer            | 41        | 3.11    | 0.93   |
| Summer            | 42        | 4.11    | 1.23   |
| Summer            | 43        | 3.38    | 1.01   |
| Summer            | 44        | 5.90    | 1.77   |
| Summer            | 45        | 2.34    | 0.70   |
| Summer            | 46        | 4.76    | 1.43   |
| Summer            | 47        | 2.38    | 0.71   |
| Summer            | 48        | 5.66    | 1.70   |
| Summer            | 49        | 3.46    | 1.04   |
| Summer            | 50        | 4.55    | 1.37   |

Cheese aged for 24 months

| Season<br>of milk | N° sample | µg/100g | µg/50g |
|-------------------|-----------|---------|--------|
| Winter            | 51        | 1.61    | 0.81   |
| Winter            | 52        | 1.88    | 0.94   |
| Winter            | 53        | 1.77    | 0.89   |
| Winter            | 54        | 1.56    | 0.78   |
| Winter            | 55        | 1.71    | 0.86   |
| Winter            | 56        | 0.99    | 0.50   |
| Winter            | 57        | 1.21    | 0.61   |

| Winter                    | 58        | 1.23    | 0.62   |
|---------------------------|-----------|---------|--------|
| Winter                    | 59        | 1.87    | 0.94   |
| Winter                    | 60        | 1.66    | 0.83   |
| Winter                    | 61        | 1.45    | 0.73   |
| Winter                    | 62        | 2.09    | 1.05   |
| Winter                    | 63        | 1.66    | 0.83   |
| Winter                    | 64        | 2.13    | 1.07   |
| Winter                    | 65        | 2.19    | 1.10   |
| Winter                    | 66        | 3.60    | 1.80   |
| Winter                    | 67        | 1.77    | 0.89   |
| Winter                    | 68        | 1.41    | 0.71   |
| Winter                    | 69        | 0.91    | 0.46   |
| Winter                    | 70        | 1.77    | 0.89   |
| Winter                    | 71        | 1.54    | 0.77   |
| Winter                    | 72        | 2.66    | 1.33   |
| Winter                    | 73        | 3.01    | 1.51   |
| Winter                    | 74        | 1.02    | 0.51   |
| Winter                    | 75        | 1.11    | 0.56   |
| Cheese aged for 40 months |           |         |        |
| Season of milk            | N° sample | µg/100g | µg/30g |
| Winter                    | 76        | 1.88    | 0.56   |
| Winter                    | 77        | 3.22    | 0.97   |
| Winter                    | 78        | 2.88    | 0.86   |
| Winter                    | 79        | 3.82    | 1.15   |
| Winter                    | 80        | 2.82    | 0.85   |
| Winter                    | 81        | 3.33    | 1.00   |
| Winter                    | 82        | 2.78    | 0.83   |
| Winter                    | 83        | 2.99    | 0.90   |
| Winter                    | 84        | 3.33    | 1.00   |
| Winter                    | 85        | 2.14    | 0.64   |
| Winter                    | 86        | 2.66    | 0.80   |
| Winter                    | 87        | 3.33    | 1.00   |
| Winter                    | 88        | 1.99    | 0.60   |
| Winter                    | 89        | 2.19    | 0.66   |
| Winter                    | 90        | 3.11    | 0.93   |
| Winter                    | 91        | 2.09    | 0.63   |
| Winter                    | 92        | 2.99    | 0.90   |
| Winter                    | 93        | 2.12    | 0.64   |
| Winter                    | 94        | 3.11    | 0.93   |
| Winter                    | 95        | 1.81    | 0.54   |
| Winter                    | 96        | 2.15    | 0.65   |
| Winter                    | 97        | 1.11    | 0.33   |
| Winter                    | 98        | 0.99    | 0.30   |
| Winter                    | 99        | 2.12    | 0.64   |
| Winter                    | 100       | 0.98    | 0.29   |



Table S4: Manganese were determined in different cheese samples for aged and collection season milk.

| Cheese aged for 24 months |           |         |        |
|---------------------------|-----------|---------|--------|
| Season of milk            | N° sample | µg/100g | µg/50g |
| Summer                    | 1         | 0.012   | 0.006  |
| Summer                    | 2         | 0.015   | 0.008  |
| Summer                    | 3         | 0.018   | 0.009  |
| Summer                    | 4         | 0.021   | 0.011  |
| Summer                    | 5         | 0.013   | 0.007  |
| Summer                    | 6         | 0.013   | 0.007  |
| Summer                    | 7         | 0.013   | 0.007  |
| Summer                    | 8         | 0.018   | 0.009  |
| Summer                    | 9         | 0.006   | 0.003  |
| Summer                    | 10        | 0.015   | 0.008  |
| Summer                    | 11        | 0.019   | 0.010  |
| Summer                    | 12        | 0.018   | 0.009  |
| Summer                    | 13        | 0.014   | 0.007  |
| Summer                    | 14        | 0.007   | 0.004  |
| Summer                    | 15        | 0.022   | 0.011  |
| Summer                    | 16        | 0.013   | 0.007  |
| Summer                    | 17        | 0.023   | 0.012  |
| Summer                    | 18        | 0.016   | 0.008  |
| Summer                    | 19        | 0.024   | 0.012  |
| Summer                    | 20        | 0.018   | 0.009  |
| Summer                    | 21        | 0.017   | 0.009  |
| Summer                    | 22        | 0.014   | 0.007  |
| Summer                    | 23        | 0.011   | 0.006  |
| Summer                    | 24        | 0.017   | 0.009  |
| Summer                    | 25        | 0.022   | 0.011  |
| Cheese aged for 40 months |           |         |        |
| Season of milk            | N° sample | µg/100g | µg/30g |
| Summer                    | 26        | 0.025   | 0.008  |
| Summer                    | 27        | 0.022   | 0.007  |
| Summer                    | 28        | 0.020   | 0.006  |
| Summer                    | 29        | 0.019   | 0.006  |
| Summer                    | 30        | 0.029   | 0.009  |
| Summer                    | 31        | 0.068   | 0.020  |
| Summer                    | 32        | 0.057   | 0.017  |
| Summer                    | 33        | 0.036   | 0.011  |
| Summer                    | 34        | 0.039   | 0.012  |

|        |    |       |       |
|--------|----|-------|-------|
| Summer | 35 | 0.040 | 0.012 |
| Summer | 36 | 0.042 | 0.013 |
| Summer | 37 | 0.076 | 0.023 |
| Summer | 38 | 0.040 | 0.012 |
| Summer | 39 | 0.032 | 0.010 |
| Summer | 40 | 0.080 | 0.024 |
| Summer | 41 | 0.047 | 0.014 |
| Summer | 42 | 0.037 | 0.011 |
| Summer | 43 | 0.046 | 0.014 |
| Summer | 44 | 0.045 | 0.014 |
| Summer | 45 | 0.038 | 0.011 |
| Summer | 46 | 0.035 | 0.011 |
| Summer | 47 | 0.036 | 0.011 |
| Summer | 48 | 0.018 | 0.005 |
| Summer | 49 | 0.040 | 0.012 |
| Summer | 50 | 0.039 | 0.012 |

Cheese aged for 24 months

| Season of milk | N° sample | µg/100g | µg/50g |
|----------------|-----------|---------|--------|
| Winter         | 51        | 0.006   | 0.003  |
| Winter         | 52        | 0.002   | 0.001  |
| Winter         | 53        | 0.004   | 0.002  |
| Winter         | 54        | 0.005   | 0.003  |
| Winter         | 55        | 0.004   | 0.002  |
| Winter         | 56        | 0.007   | 0.004  |
| Winter         | 57        | 0.008   | 0.004  |
| Winter         | 58        | 0.007   | 0.004  |
| Winter         | 59        | 0.003   | 0.002  |
| Winter         | 60        | 0.005   | 0.003  |
| Winter         | 61        | 0.004   | 0.002  |
| Winter         | 62        | 0.008   | 0.004  |
| Winter         | 63        | 0.007   | 0.004  |
| Winter         | 64        | 0.005   | 0.003  |
| Winter         | 65        | 0.006   | 0.003  |
| Winter         | 66        | 0.008   | 0.004  |
| Winter         | 67        | 0.003   | 0.002  |
| Winter         | 68        | 0.010   | 0.005  |
| Winter         | 69        | 0.006   | 0.003  |
| Winter         | 70        | 0.007   | 0.004  |
| Winter         | 71        | 0.040   | 0.020  |
| Winter         | 72        | 0.009   | 0.005  |
| Winter         | 73        | 0.007   | 0.004  |
| Winter         | 74        | 0.011   | 0.006  |
| Winter         | 75        | 0.009   | 0.005  |

Cheese aged for 40 months

| Season of milk | N° sample | µg/100g | µg/30g |
|----------------|-----------|---------|--------|
|----------------|-----------|---------|--------|

|        |     |       |       |
|--------|-----|-------|-------|
| Winter | 76  | 0.015 | 0.005 |
| Winter | 77  | 0.011 | 0.003 |
| Winter | 78  | 0.01  | 0.003 |
| Winter | 79  | 0.011 | 0.003 |
| Winter | 80  | 0.013 | 0.004 |
| Winter | 81  | 0.028 | 0.008 |
| Winter | 82  | 0.024 | 0.007 |
| Winter | 83  | 0.026 | 0.008 |
| Winter | 84  | 0.021 | 0.006 |
| Winter | 85  | 0.012 | 0.004 |
| Winter | 86  | 0.032 | 0.01  |
| Winter | 87  | 0.055 | 0.017 |
| Winter | 88  | 0.02  | 0.006 |
| Winter | 89  | 0.028 | 0.008 |
| Winter | 90  | 0.05  | 0.015 |
| Winter | 91  | 0.037 | 0.011 |
| Winter | 92  | 0.032 | 0.01  |
| Winter | 93  | 0.038 | 0.011 |
| Winter | 94  | 0.037 | 0.011 |
| Winter | 95  | 0.018 | 0.005 |
| Winter | 96  | 0.022 | 0.007 |
| Winter | 97  | 0.025 | 0.008 |
| Winter | 98  | 0.011 | 0.003 |
| Winter | 99  | 0.025 | 0.008 |
| Winter | 100 | 0.023 | 0.007 |

---
